# Supplementary material for: Structural and biochemical characterization of the class II fructose-1,6-bisphosphatase from Francisella tularensis
Source: PubMed Central journal article supplement (PMC7605111; doi:10.1107/s2053230x20013370), 2020-10-23
Supplement: f-76-00524-sup1.pdf [file f-76-00524-sup1.pdf]

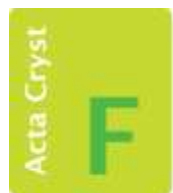

STRUCTURAL BIOLOGY  
COMMUNICATIONS

**Volume 76 (2020)**

**Supporting information for article:**

**Structural and biochemical characterization of the class II fructose-1,6-bisphosphatase from *Francisella tularensis***

**Anna I. Selezneva, Hiten J. Gutka, Nina M. Wolf, Fnu Qurratulain, Farahnaz Movahedzadeh and Celerino Abad-Zapatero**

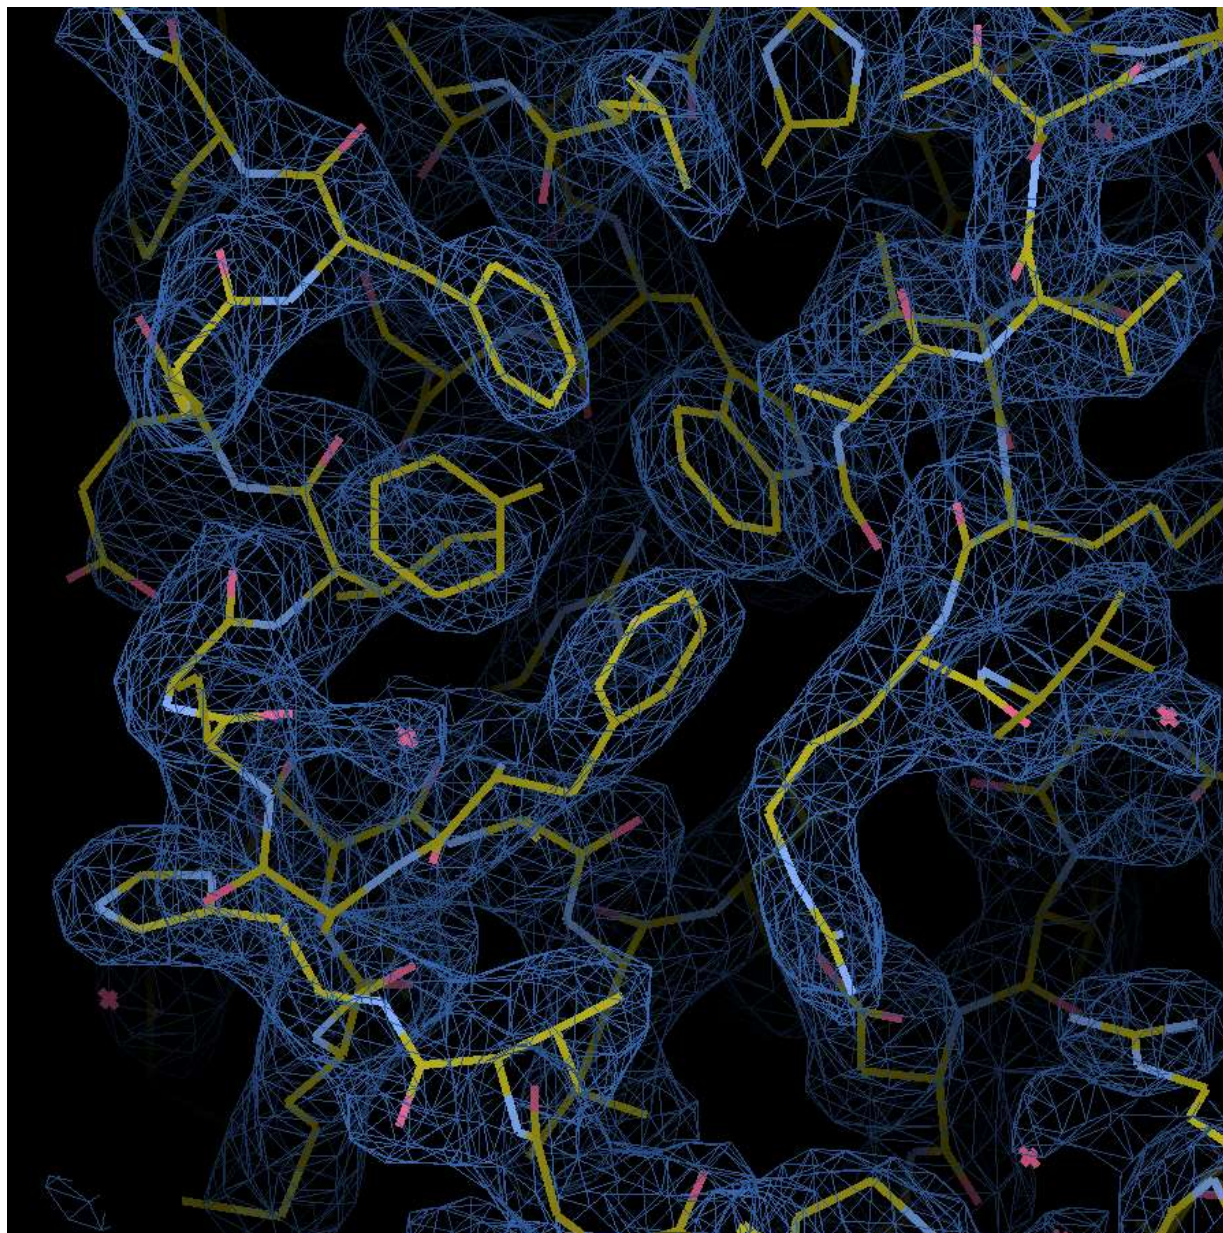

**Figure S1** Sample of the electron density map in the final stages of refinement. Electron density showing the fitted polypeptide chain corresponding to the last eleven residues of the C-terminus forming a hydrophobic ‘core’ of *Ft*FBPaseII in Chain A. They fold around a very compact hydrophobic cluster that includes three Phe residues and is next to Trp21 in the N-terminal part of the chain including a short helical segment (H14) (see below). This stretch of eleven a.a. is unique to the sequence of related FBPases in Fig.3 and is conserved in the genus *Francisella*

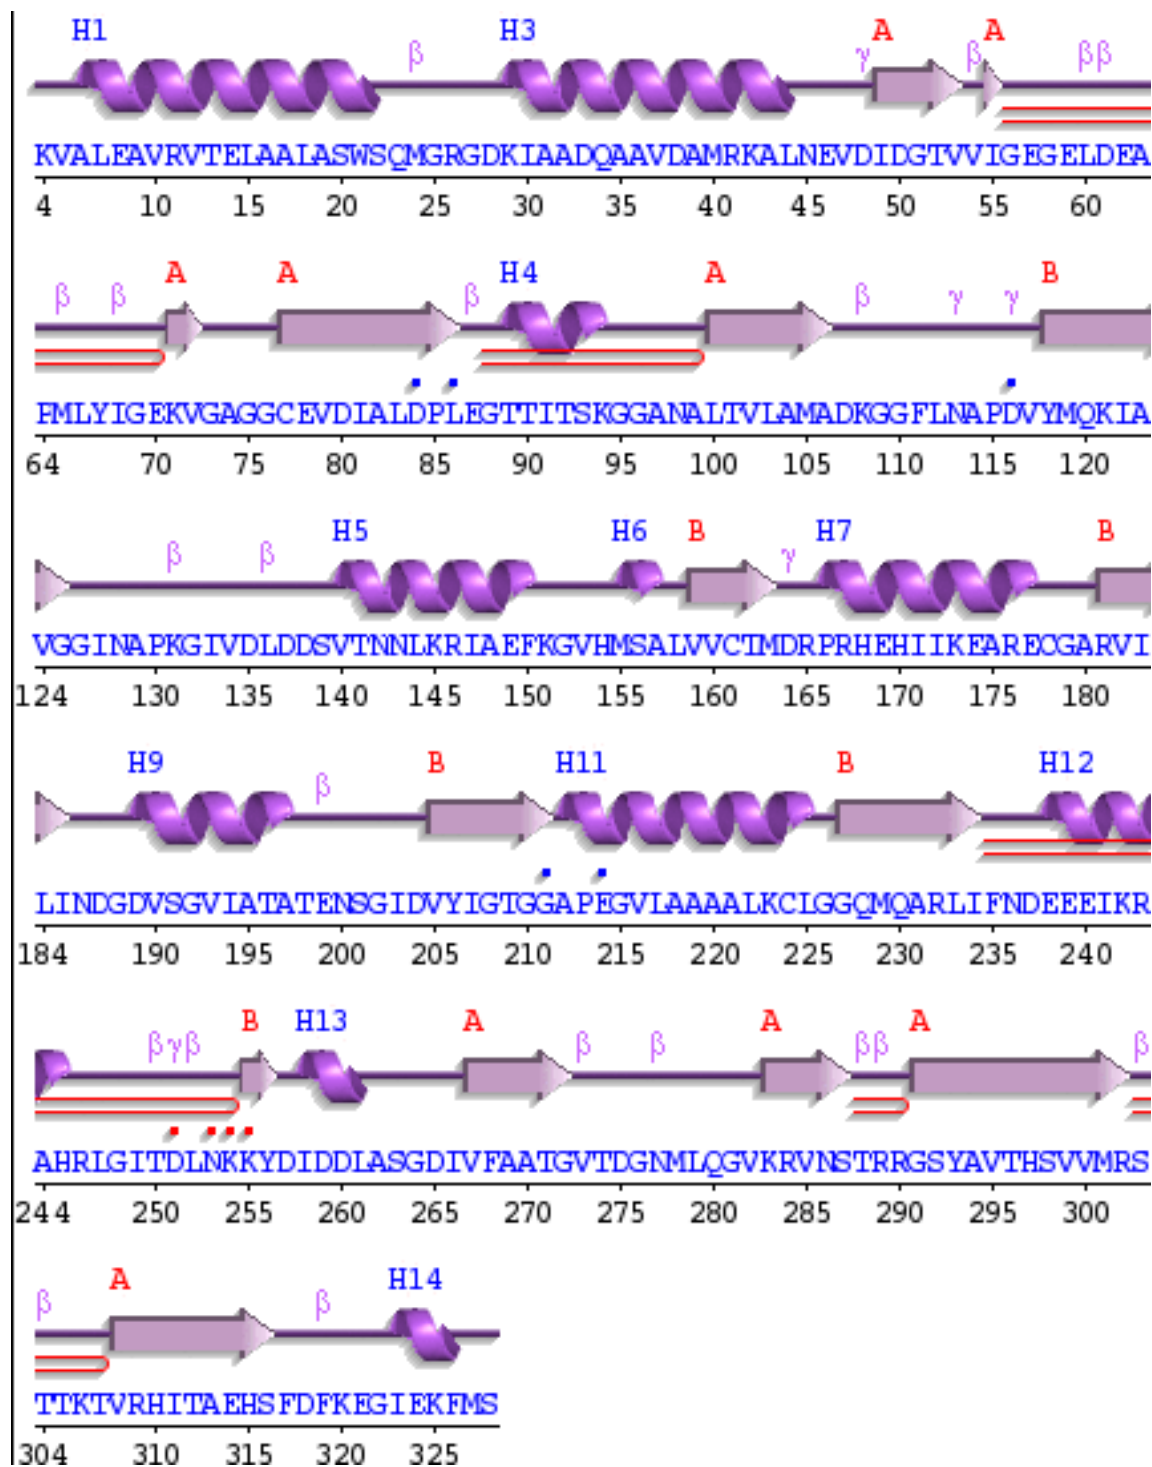

**Figure S2** Secondary structure diagram of the Chain A of the *Ft*FBPaseII tetramer with the basic structural elements numbered along the polypeptide chain. The structure consists of two beta sheets (A, B). The central sheet (B) contains six strands surrounded on each side by four strands of the A sheet. The final helical segment (H14) is unique to *Ft*FBPaseII and is part of the C-terminal core, whose function is unknown. Figure prepared within PDBsum (Laskowski et al., 2017).

**Table S1** Macromolecule-production information.

|                                                                     |                                                                                                                                                                                                                                                                                                                                                                                                        |
|---------------------------------------------------------------------|--------------------------------------------------------------------------------------------------------------------------------------------------------------------------------------------------------------------------------------------------------------------------------------------------------------------------------------------------------------------------------------------------------|
| Source organism                                                     | <i>F. tularensis</i>                                                                                                                                                                                                                                                                                                                                                                                   |
| DNA source                                                          | <i>F. tularensis glpX</i> gene<br>(FTF1631c)                                                                                                                                                                                                                                                                                                                                                           |
| Cloning strategy                                                    | Synthesized and cloned by CelTek<br>Inc.                                                                                                                                                                                                                                                                                                                                                               |
| T89A forward primer                                                 | CCCGCTGGAAGGTGCGACCATTACCAGC                                                                                                                                                                                                                                                                                                                                                                           |
| T89S forward primer                                                 | CCCGCTGGAAGGTTTCGACCATTACCAGC                                                                                                                                                                                                                                                                                                                                                                          |
| Expression vector                                                   | pET15b                                                                                                                                                                                                                                                                                                                                                                                                 |
| Expression host                                                     | <i>E. coli</i> strain BL21(DE3)                                                                                                                                                                                                                                                                                                                                                                        |
| Complete amino-acid sequence of the<br>wild type construct produced | MGSSHHHHHSSGLVPRGSHMNRKVALEAVR<br>VTELAALASWSQMGRGDKIAADQAAVDAMRK<br>ALNEVDIDGTVVIGEGELDEAPMLYIGEKVGAG<br>GCEVDIALDPLEGTTITSKGGANALTVLAMADK<br>GGFLNAPDVYMQKIAVGGINAPKGIVDLDDSV<br>TNNLKRIAIEFKGVHMSALVVCTMDRPRHEHIK<br>EARECGARVILINDGDVSGVIATATENSGIDVYI<br>GTGGAPEGVLAALAAALKCLGGQMQRARLIFNDEE<br>EIKRAHRLGITDLNKKYDIDDLASGDIVFAATG<br>VTDGNMLQGVKRVNSTRRGSYAVTHSVVMRS<br>TTKTVRHITAEHSFDFKEGIEKFMS |

**Table S2** Crystallization conditions for Crystal B.

|                                              |                                                                                    |
|----------------------------------------------|------------------------------------------------------------------------------------|
| Method                                       | Sitting-drop vapor diffusion                                                       |
| Plate type                                   | 96-well plate                                                                      |
| Temperature (°K)                             | 291                                                                                |
| Protein concentration (mg ml <sup>-1</sup> ) | 10                                                                                 |
| Buffer composition of protein solution       | 20 mM Tricine pH 7.8, 50 mM KCl, 1 mM MgCl <sub>2</sub> , 0.1 mM DTT, 15% glycerol |
| Composition of reservoir solution            | 0.2 M sodium formate, 20% PEG 3350                                                 |
| Volume and ratio of drop                     | 2n (1:1)                                                                           |
| Volume of reservoir (ml)                     | 100                                                                                |

**Table S3** . Comparisons among the four different subunits of the FtFBPase

(a) Summary of RMSD<sup>a</sup> and average<sup>b</sup> distances (Å, upper diagonal) and B factor differences (RMSD<sup>a</sup>/averages<sup>b</sup>) (Å<sup>2</sup>, lower diagonal) among the different chains (A-D) of the *FtFBPaseII* tetramer.

|   | A                                     | B            | C            | D                                      |
|---|---------------------------------------|--------------|--------------|----------------------------------------|
| A | -                                     | 0.56<br>0.42 | 0.74<br>0.55 | 1.08 <sup>a</sup><br>0.82 <sup>b</sup> |
| B | 13.4 <sup>a</sup><br>7.9 <sup>b</sup> | -            | 0.76<br>0.57 | 1.04<br>0.77                           |
| C | 38.6<br>33.7                          | 32.3<br>25.8 | -            | 1.07<br>0.81                           |
| D | 27.4<br>18.4                          | 21.5<br>10.5 | 22.6<br>15.5 | -                                      |

(b). Rotation angles among the different subunits in the *FtFBPaseII* tetramer and *MtFBPaseII* dimer in the asymmetric unit of the corresponding crystals. \*Values in the three different columns for *MtFBPaseII* correspond to the rotation angle transformations between the two chains (A>B) found in the a.u. for apo (6ayy) and the T84S-F6P (6ayu), T84A-F6P (6ayv) crystallographic complexes, respectively.

|                      | A>B   | A>C   | A>D   | B>C   | B>D   | C>D   |
|----------------------|-------|-------|-------|-------|-------|-------|
| <i>FtFBPase</i> (°)  | 179.5 | 178.4 | 177.6 | 179.1 | 178.9 | 179.8 |
| <i>MtFBPase*</i> (°) | 176.4 | 176.5 | 176.3 |       |       |       |

**Table S4** Summary of the kinetic parameters for class II FBPases related to this work.

Top: Kinetic parameters for the FtFBPaseII enzyme (wt and T89S mutant; T89A mutant was inactive) presented in this work in relation to the ones reported before. Bottom: corresponding values for the highly homologous MtFBPaseII present in *M. tuberculosis*.

| <b>FtFBPaseII</b> | <b>K<sub>m</sub><br/>(<math>\mu\text{M}</math>)</b> | <b>V<sub>max</sub><br/>(<math>\mu\text{mol min}^{-1} \text{mg}^{-1}</math>)</b> | <b>k<sub>cat</sub><br/>(<math>\text{s}^{-1}</math>)</b> | <b>k<sub>cat</sub>/K<sub>m</sub><br/>(<math>\text{s}^{-1} \text{mM}^{-1}</math>)</b> | <b>Reference</b> |
|-------------------|-----------------------------------------------------|---------------------------------------------------------------------------------|---------------------------------------------------------|--------------------------------------------------------------------------------------|------------------|
| WT                | 11 ± 2                                              | 2.1 ± 0.1                                                                       | 1.2 ± 0.06                                              | 115                                                                                  | a                |
| WT                | 17 ± 4                                              | 0.9 ± 0.1                                                                       | 0.55 ± 0.04                                             | 33                                                                                   | This work        |
| T89S              | 4 ± 2.1                                             | 0.2 ± 0.03                                                                      | 0.12 ± 0.02                                             | 31                                                                                   | This work        |
| <b>MtFBPaseII</b> |                                                     |                                                                                 |                                                         |                                                                                      |                  |
| WT                | 3.7 ± 0.1                                           | 3.5 ± 2.4                                                                       | 2.1 ± 1.5                                               | 570                                                                                  | b                |
| T84S              | 5.7 ± 1.2                                           | 0.37 ± 0.26                                                                     | 0.22 ± 0.16                                             | 39                                                                                   | b                |

References: <sup>a</sup>(Gutka et al. 2017), <sup>b</sup>(Bondoc et al. 2017)



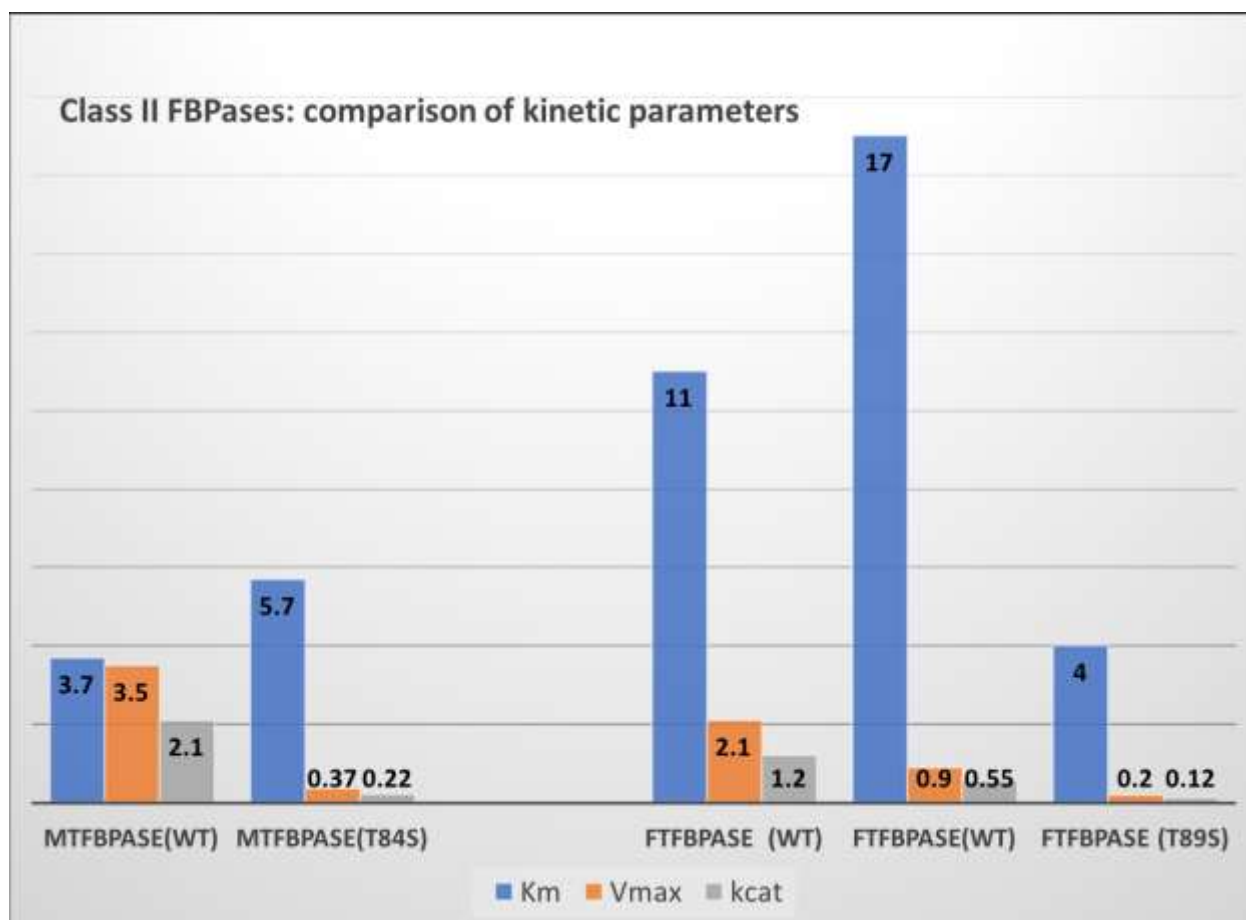

**Figure S3** Graphical summary of the kinetic parameters listed in Table SI2 for the two class II FBPases discussed in this work: *Mt*FBPase and *Ft*FBPase (wild type and active site mutants) T84S and T89S, respectively homologous in the a.a. sequence.



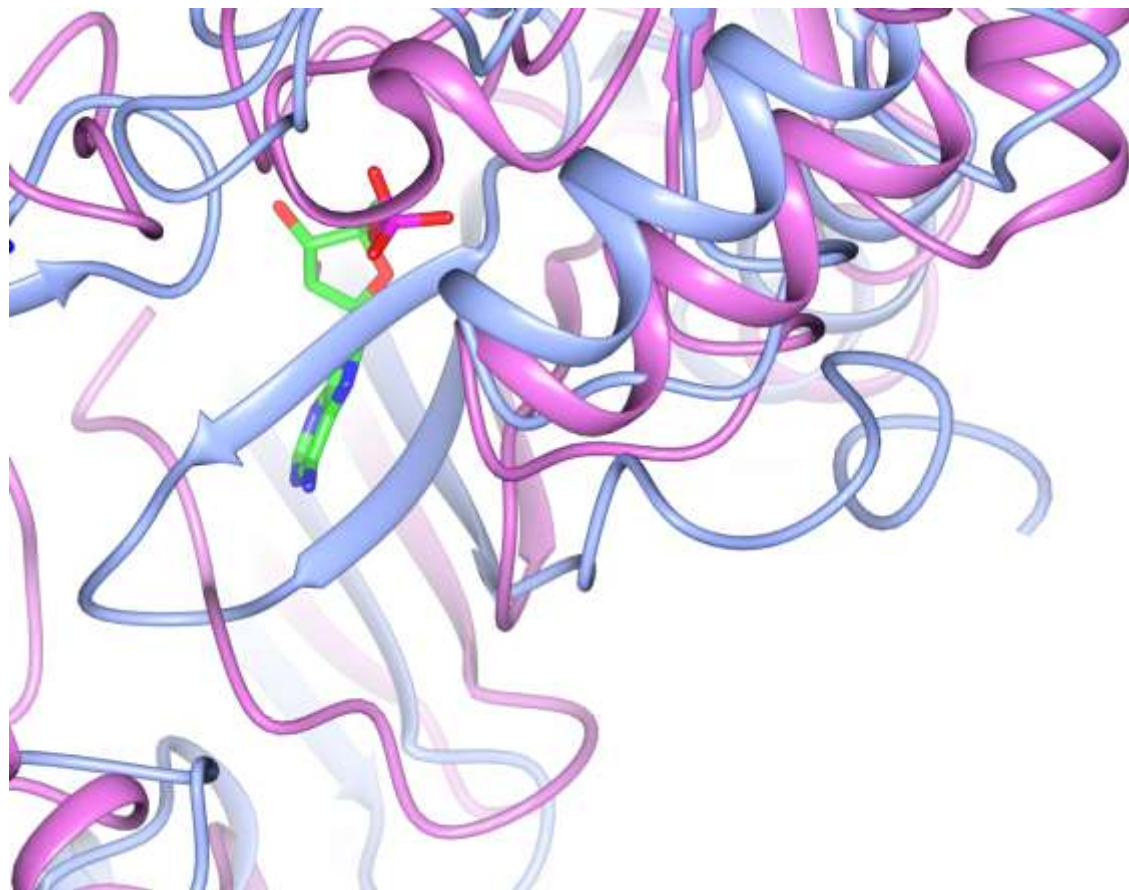

**Figure S4** Differences between *Synechocystis* and *FtFBPaseII* near the allosteric effector pocket. Comparison of the C-terminal extensions in 3rpl (purple) with the bound allosteric effector AMP (green-red-blue:carbon-oxygen-nitrogen) in the interior of the tetramer, in relation to the external extension of the same part of the polypeptide chain in *FtFBPaseII* (blue). See above: C-terminus hydrophobic 'core' (Fig. S11). The image also contrasts the shorter terminal  $\beta$ -strands in 3rpl with the longer corresponding two strands and hairpin-loop extension (front) in *FtFBPaseII* (blue) that are 'curved' inwards towards the AMP pocket.
